## RESEARCH ARTICLE

# The degree of association between overweight and obesity with the use of electronic media among Bangladeshi adolescents

Suvasish Das Shuvo<sup>1</sup>\*, Biplob Kumar Biswas<sup>2</sup>

Department of Nutrition and Food Technology, Jashore University of Science and Technology, Jashore, Bangladesh

\* These authors contributed equally to this work.

\* [shuvo\\_nft@just.edu.bd](mailto:shuvo_nft@just.edu.bd)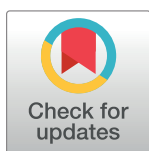

## Abstract

### Background

Electronic media usage is recently considered a modifiable risk factor for overweight and obesity among adolescents. The purpose of this present study was to evaluate the association of electronic media (EM) usage with overweight and obesity among school-going adolescents.

### Methods

This cross-sectional study was conducted from October to December 2019 among school-going adolescents (14–16 years old) residing in the Jashore Sadar Upazila, Jashore district of Bangladesh. A standardized questionnaire was used to collect information regarding the socio-economic status, time spent watching television, video games playing, computer, and smart mobile phone use through face-to-face interviews. Age- and sex-specific body mass index (BMI) cut-off values for overweight and obesity were determined for Asian adolescents by the International Obesity Task Force (IOTF). Multinomial logistic regression analysis was carried out to determine the association between electronic media use with overweight and obesity.

### Findings

The findings suggest that the overall prevalence of overweight and obesity was 13.5% and 25.2%, respectively. Among the total adolescent students, about 49.1% highly (above 3 hours per day) spent their time on EM use whereas 30.6% moderately ( $\geq 121$  to 180 min/day) use EM. The regression analysis showed that spending high time using total screen-based electronic devices, television viewing, video game playing, computer use, and smart-phone use were significantly associated with overweight (RRR: 7.36, 95% CI: 3.64–11.54; RRR: 4.58, 95% CI: 1.46–7.95; RRR: 4.45, 95% CI: 2.75–6.12; RRR: 3.18, 95% CI: 1.87–4.70; RRR: 2.15, 95% CI: 1.23–3.51) and obesity (RRR: 8.72, 95% CI: 4.64–12.54;

## OPEN ACCESS

**Citation:** Shuvo SD, Biswas BK (2023) The degree of association between overweight and obesity with the use of electronic media among Bangladeshi adolescents. PLoS ONE 18(1): e0280544. <https://doi.org/10.1371/journal.pone.0280544>

**Editor:** Zulkarnain Jaafar, Universiti Malaya, MALAYSIA

**Received:** August 2, 2021

**Accepted:** January 3, 2023

**Published:** January 20, 2023

**Copyright:** © 2023 Shuvo, Biswas. This is an open access article distributed under the terms of the [Creative Commons Attribution License](https://creativecommons.org/licenses/by/4.0/), which permits unrestricted use, distribution, and reproduction in any medium, provided the original author and source are credited.

**Data Availability Statement:** The data availability is not possible due to the privacy restrictions of patient confidentiality and restrictions upon the data to protect students confidentiality imposed by survey institutional authority. But future data requests may available at [researchsurvey.team22@gmail.com](mailto:researchsurvey.team22@gmail.com) for researchers who meet the criteria for access to confidential data.

**Funding:** The author(s) received no specific funding for this work.

**Competing interests:** The authors have declared that no competing interests exist.

**Abbreviations:** EM, Electronic media; WHO, World Health Organization; BMI, Body Mass Index; MARCA, Multimedia Activity Recall for Children and Adolescents; RRR, Relative Risk Ratio; CI, Confidence Interval.

RRR: 2.89, 95% CI: 1.31–5.21; RRR: 3.88, 95% CI: 1.74–5.13; RRR: 3.08, 95% CI: 1.32–4.86; RRR: 1.19, 95% CI: 0.93–1.48) in adolescents, respectively.

## Conclusion

The results support the total time spent using electronic media was associated with an increased risk of being overweight and obesity. Finally, this study strongly suggests the proper use of electronic media may be necessary to reduce the risk of being overweight and obesity in early adolescents.

## 1. Introduction

Adolescence is a significant period (from ages 10 to 19) of human life with major formative encounters introducing the much-expected move from childhood to adulthood [1]. The well-being of children and teenagers is of most extreme significance to each country, as they are respected as one of the basic determinants of future economic and societal development [1]. Globally, the prevalence rate of overweight and obesity in adolescents is increasing rapidly and is a major alarming public health threat in both developed and developing countries [2]. Obesity and overweight are characterized as abnormal or excessive fat accumulation, which is primarily caused by an imbalance between energy intake and expenditure and may lead to impaired health [3]. According to World Health Organization (WHO), above 158 million children and adolescents were considered obese in 2020 [3] whereas nearly 81% were reported from developing countries [4, 5]. It is also projected that the prevalence of overweight and obesity will touch 254 million by 2030 around the world [3]. The increasing rate of overweight (9.5%) and obesity (3.5%) is also a concerning issue in Bangladesh [6, 7]. Shreds of evidence from some studies also explain that the double burden of malnutrition (DBM) is an emerging public health issue in Bangladesh nowadays whereas undernutrition is a predominant burden with the escalating burden of overweight and obesity [8]. In recent years, sedentary behavior is becoming a key factor in obesity, and it should be recognized as a separate behavior from physical activity [9].

Sedentary behavior is defined as sitting or reclining during waking hours when energy expenditure is less than 1.5 metabolic equivalents [10]. Although there are various forms of sedentary behavior, the most prominent is screen-based electronic devices (e.g., watching television or using a computer and smart mobile phone), which are frequently used as a proxy indicator of sedentariness among adolescents [11]. In recent years, sedentary behaviors play a significant role in increasing the risk of overweight and obesity among adolescents [9, 11, 12]. Several epidemiological studies and meta-analyses have suggested that all sedentary behaviors including television viewing, videogame playing, computer, and smartphone use are related to an increased risk for overweight and obesity [11, 13, 14]. Different studies proposed that the possible mechanism for overweight and obesity because of using electronic media (EM) are displacement of physical activity, reduction in resting energy expenditure compared to other activities, increased sleep deprivation, exposure to advertising, and consequent use of foods commonly advertised on television, and increased calorie intake [14–16]. Additionally, It was hypothesized that the use of EM might displace the amount of strenuous physical activity time with the increased sedentary activities [14, 16–18]. Besides advertisements telecast during programs on television also increase the risk of overweight and obesity [17, 18]. Recent empirical studies reveal that computer use and video game playing was associated with the risk of obesity

among adolescents [14, 17, 19]. But the evidence of a relationship between smartphone use and the risk of overweight and obesity is still limited [14, 16].

Furthermore, the regular use of EM in adolescents' recreational and academic daily life is increasing gradually which may result in an escalation of obesity [9, 13, 20]. Problematic social media use is impacting an increasing number of adolescents' daily activities, academic achievement, family ties, and emotional regulation [21]. Different studies also explored that heavy use of EM decreases physical activity time in youth adolescents which may be a potential risk factor for higher Body Mass Index (BMI) in youth adolescents [11, 15, 22]. Adolescent sedentary behavior can persist into adulthood and contribute to the development of chronic disease later in life and is well-recognized to associate with co-morbidities [23]. Additionally, numerous studies have identified overweight or obesity among adults as a strong predictor of the development of premature death and chronic Non-communicable Diseases (NCDs) including type-2 diabetes, hypertension, cardiovascular diseases, and cancer [24–26].

However, several studies have identified the effects of excessive screen-based electronic device (EM) use on the risk of overweight/obesity in adolescents which do exist have mainly been undertaken in both developed and developing countries [13–16, 22]. Evidence on the relationship between EM use and obesity among young adolescents in Bangladesh perspective is hardly available. Likewise, very few studies have investigated gender differences and screen-based behaviors of adolescents [13, 27]. In Bangladesh, rapid socio-economic growth and increasing urbanization can be associated with an increase in sedentary behavior. Recently, adolescents are being engaged at a great rate in technological interactions (e.g., social networking via Facebook, and Twitter) and screen-based activities (e.g., television, and smartphone), which are sedentary in nature [27]. Since the concurrent usage of various electronic screen devices has become an emerging trend in Bangladesh, a comprehensive investigation of the usage of several EM may help us to understand the overall situation. Therefore, the purpose of this study was to evaluate the association between electronic media use and BMI among Bangladeshi adolescents.

## 2. Methods

### 2.1 Study area

This study was conducted at Jashore *Sadar* Upazila, Jashore district of Bangladesh, which is an administrative town of the Jashore district, also the center of the district. Jashore *Sadar* Upazila area is 435.41 square kilometers, located between 23°04' and 23°20' north latitudes and between 89°06' and 84°06' east longitudes [28]. The total number of adolescents residing in the urban areas of the *Sadar* district was 150462 [28]. Overnutrition is one of the main health problems among adolescents in the southwestern regional state. It is predominantly seen among the urban population, nearly 19% and 11% of adolescents are overweight and obese [6]. Recently, adolescent obesity is a major recent concerning study issue in Bangladesh. Thus, we selected the study area.

### 2.2 Study design and sample selection

A cross-sectional study was conducted among Bangladeshi secondary school adolescents residing in the Jashore *Sadar* Upazila, Jashore district of Bangladesh. The respondents of class eight and nine grade students aged between 14 to 16 years old were included in this study. The estimated sample size of 246 was determined by using formula  $Z_{1-\alpha/2}^2 p(1-p)/d^2$  with the previously published studies prevalence of overweight and obesity [6] (considering 20% prevalence), 5% margin of error to be tolerated at the 95% level of confidence, and 95% response rate. Hence,  $N = Z^2 p(1-p)/d^2 = (1.96)^2 \times (0.20) \times (1-0.20)/(0.05)^2 \cong 246$ . Although

400 respondents were approached, only 350 eligible respondents agreed to participate. Adolescents aged below 14 years and above 16 years were excluded from this study. As well, respondents with missing values for measured height, weight, and adolescents with incomplete information on electronic media use at the time of the survey were also excluded (Fig 1). This survey includes secondary educational institutions from three places (*Jashore Jila School, Govt. Momin's Girls School Jashore, and Madhusudan Taraprosunno Girls School*) in urban areas of the Jashore Sadar Upazila, Jashore District. A two-phase cluster sample was designed to collect the respondents. Firstly, the probability of secondary schools being selected was proportional to the number of students in the specified grades and secondly, all the respondents were selected by a simple random sampling method from the selected classes.

### 2.3 Data collection and study variables

A face-to-face interview was conducted by the four trained interviewers who had academic and research experiences in the related field were enrolled to collect the data. Data were collected between October and December 2019, during regular school hours in the presence of the classroom teacher and by trained interviewers. A validated standardized survey questionnaire was firstly designed in the English language then translated to the native language (Bengali) and again re-translated back to English to check for its uniformity. A pretested questionnaire was asked of the school adolescents to collect the data. The purpose of the study was clearly explained to adolescents and those who agreed to join the study were asked to sign an agreement form.

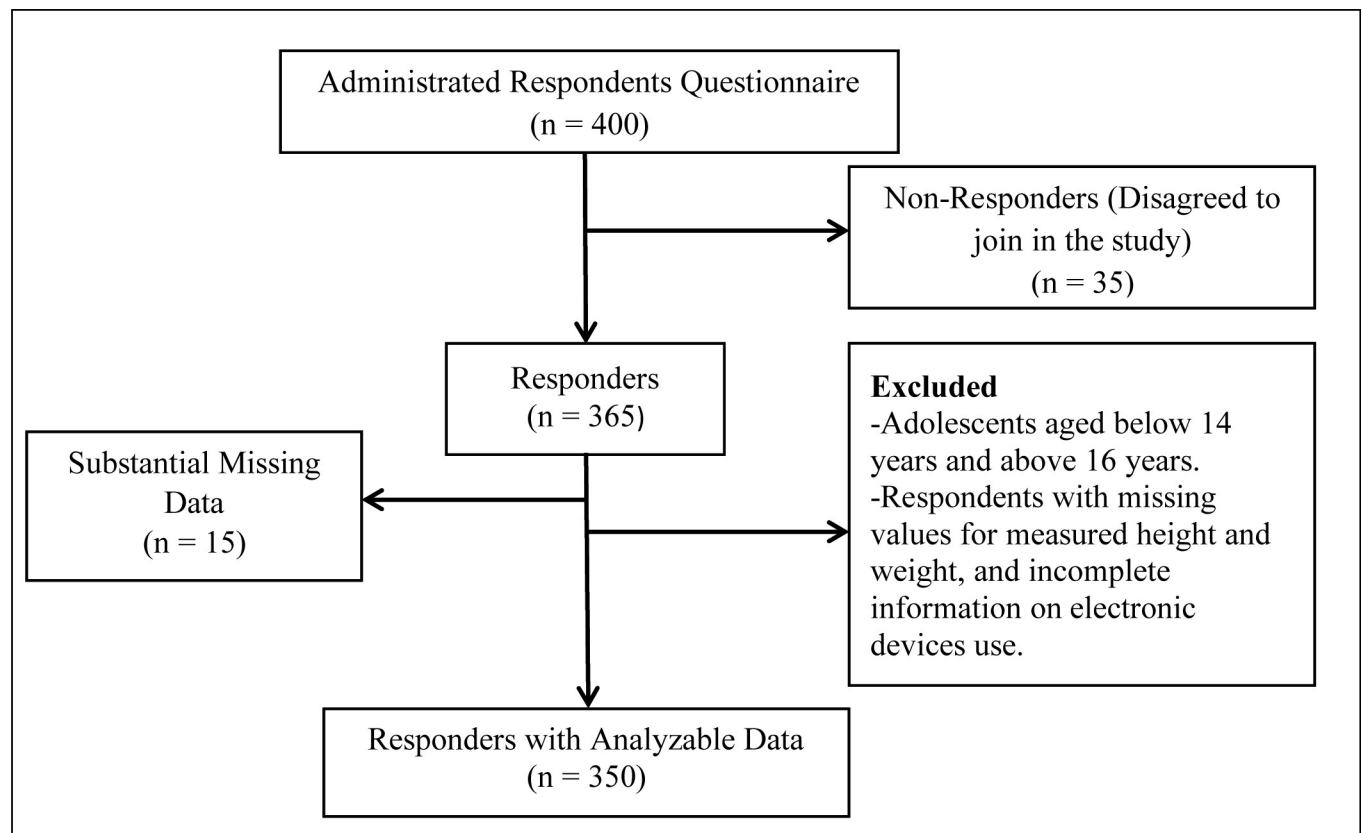

**Fig 1. Flow chart of respondent's recruitment.**

<https://doi.org/10.1371/journal.pone.0280544.g001>

**2.3.1 Socioeconomic variables.** Socioeconomic data of the respondents were obtained through closed-ended questions including their gender, grade of school, unhealthy eating habits during electronic media use, physical exercise, parent's educational level, occupation, and monthly family income. Monthly family income was categorized into four classes:  $\leq 10,000$  Bangladeshi Taka (BDT), 10,001–20,000 BDT, 20,001–30,000 BDT, and  $> 30,000$  BDT.

**2.3.2 Outcome variable.** This study mainly focused on the outcome of overweight and obesity based on the screen time used by respondents. The survey collected an individual's measurement of weight and height to calculate the Body Mass Index (BMI) [BMI = weight (in kilograms) / height (in meters squared)]. According to the International Obesity Task Force (IOTF) using age- and sex-specific BMI cut-off points for overweight and obesity for adolescents are defined as  $25 \text{ kg/m}^2$  and  $30 \text{ kg/m}^2$ , and  $23 \text{ kg/m}^2$  and  $25 \text{ kg/m}^2$  for Asian children and adolescents, respectively [29, 30]. The function *zbmicat* in Stata was used to categorize adolescents as obese, overweight, or normal weight. In this analysis, since underweight was not the main concern, it was merged with the normal group to derive a new category (BMI  $\leq 22.9$ ), considered normal that was used as a reference in logistic regression analysis [29]. To evaluate the risk ratio, these outcome variables were coded: 0 for normal weight, 1 for overweight, and 2 for obesity.

**2.3.3 Exposure variables.** The main variables of interest in the present study were daily television, video game, computer, smartphone, and total electronic media use. Electronic media (EM) use time data collected from each adolescent by using the Multimedia Activity Recall for Children and Adolescents (MARCA) 24-hour activity recall diary [31, 32]. Respondents were requested to complete MARCA dairies' school days and or another day (weekend, holiday, or day off from school) with the help of an interviewer. Adolescents who did not give the impression to make a good effort at recall were excluded from the analysis.

The MARCA's analytical software module was used to estimate minutes (per recall) regarding television watching, computer use (for typing, Internet), video games playing (via computer, other e-games), and smartphone use (talking/messaging/watching video). This study categorized total and individual electronic media use into four quartiles including none, low, medium, and high users according to specific electronic media use time for consistency [23, 24]. The use of the computer for video game playing does not include in the category of computer use which was considered within the video games category. The average daily time spent in EM use was calculated in both school and non-school day recall which was again calculated as the average of the average school and non-school day recall [32, 33].

## 2.4 Estimation strategy

Descriptive statistics (frequency and percentages) were performed for the explanatory variables by outcome variables, and the prevalence of BMI within different categories of a variable was assessed using the Chi-square test. Multinomial logistic regression models were used to explore the association of electronic media use with overweight and obesity. Average daily media use, computer, video game, and smartphone use were selected as a covariate in the logistic regression analysis for the continuous outcomes (overweight and obesity). The model was adjusted with gender, grade of school, eating habits, and physical exercise variables. Results were presented with a relative risk ratio (RRR) and 95% confidence interval. Categorical independent measures were entered into the model using categorical variables to compare the effect between the first category (reference) and each other category. The potential collinearity of the predictor variables and the outcome variable were examined using the Variance Inflation Factors (VIFs) before fitting the models. The VIFs for all covariates that were included in the multinomial logistic regression analysis were less than 2.0 [34]. All statistical analyses were conducted using Stata version 14.0 and the *p*-value was set at  $< 0.05$  level for statistical significance.

## 2.5 Ethical considerations

Ethical approval and prior permission were obtained from the institutional Ethical Review Committee of the Faculty of Biological Science and Technology, Jashore University of Science and Technology, Bangladesh (Ref: ERC/FBST/JUST/2021-60). All the study respondents formally consented before their participation and signed consent was obtained for each participant. Additionally, consent from also obtained from all parents of the minors. Keeping confidentiality in data collection, the data collector, supervisor, and investigator used code numbers instead of the student's name.

## 3. Results

**Table 1** shows the socio-demographic status of the study participants. Among 350 adolescents, 60.8% were boys and 39.2% were girls. Approximately, 57% were studied in class nine and 43% were in class eight. Overall 51.7% of adolescents had unhealthy eating habits during electronic media use and 62.4% did not regularly perform physical exercise. Regarding parents' education level, 44% and 62% of respondent's mothers and fathers received graduate degrees, while 13.2% and 10.9% of the adolescents' mothers and fathers had completed primary

**Table 1. Background characteristics of study participants.**

| Variables                                           | Categories        | Frequency (%) |
|-----------------------------------------------------|-------------------|---------------|
| Gender                                              | Boy               | 213 (60.8)    |
|                                                     | Girl              | 137 (39.2)    |
| Grade of school                                     | Eight             | 150 (42.9)    |
|                                                     | Nine              | 200 (57.1)    |
| Unhealthy eating habits during electronic media use | Yes               | 181 (51.7)    |
|                                                     | No                | 169 (48.3)    |
| Physical exercise ( $\geq 30$ min/day)              | Yes               | 132 (37.6)    |
|                                                     | No                | 218 (62.4)    |
| Mother's educational level                          | Primary           | 46 (13.2)     |
|                                                     | Secondary         | 74 (21.1)     |
|                                                     | Higher Secondary  | 76 (21.7)     |
|                                                     | Graduation degree | 154 (44.0)    |
| Father's educational level                          | Primary           | 38 (10.9)     |
|                                                     | Secondary         | 45 (12.8)     |
|                                                     | Higher Secondary  | 50 (14.3)     |
|                                                     | Graduation degree | 217 (62.0)    |
| Mother's occupation                                 | Housewife         | 271 (77.4)    |
|                                                     | Govt. Employee    | 38 (10.9)     |
|                                                     | Private Employee  | 31 (8.8)      |
|                                                     | Business          | 10 (2.9)      |
| Father's occupation                                 | Govt. Employee    | 89 (25.6)     |
|                                                     | Private Employee  | 86 (24.7)     |
|                                                     | Business          | 160 (40.0)    |
|                                                     | Day labor         | 13 (3.7)      |
| Monthly family income (BDT)                         | $\leq 10,000$     | 24 (6.9)      |
|                                                     | 10,001–20,000     | 61 (17.4)     |
|                                                     | 20,001–30,000     | 130 (37.1)    |
|                                                     | $> 30,000$        | 135 (38.6)    |

<https://doi.org/10.1371/journal.pone.0280544.t001>

education. In terms of parents' occupation, about 78% of adolescents' mother was housewives and 40% of adolescents' father was businessmen while nearly 4% was day laborers. A total of 39% and 37% of the adolescents' monthly family income were above 30,000 BDT, and between 20,001–30,000 BDT.

Adolescents spent time using electronic media (EM) presented in Fig 2. Among the total adolescent students, about 49.1% highly (above 3 hours per day) spent using electronic media whereas 30.6% and 20.3% were moderate ( $\geq 121$  to 180 min/day) and low ( $< 121$  min/day) electronic media users. In this study, 19.7% and 43.8% of students moderately ( $\geq 69$  to  $< 115$  min/day) and highly ( $\geq 115$  min/day) watched television, 15.4%, and 25.9% were moderately ( $\geq 30$  to 45 min/day) and highly ( $\geq 45$  min/day) played video games, 14.5% and 22.7% moderately ( $\geq 30$  to 45 min/day) and highly ( $\geq 45$  min/day) used computer, 8.6% and 9.5% moderately ( $\geq 16$  to  $< 30$  min/day) and highly ( $\geq 30$  min/day) used smartphone. Moreover, 14.6%, 37.4%, 49.7%, and 47.2% reported not watching television, not playing video games, and not using the computer, and smartphone, respectively.

These findings also explain that 25.2% were obese and 13.5% were overweight school adolescents while 36.8% were of normal weight (Fig 3). The prevalence of overweight and obesity increased with unhealthy eating habits during electronic media use and physical inactivity ( $P < 0.05$ ) (Table 2). This study further presented that the prevalence of overweight was considerably higher among adolescents who were moderately (15.6% vs 11.6%) and highly (17.2% vs 11.6%) use computer compared with those who were not ( $P < 0.001$ ). Again, a significantly higher proportion of the participants with moderate and high smartphone users had experienced being overweight and obese ( $P < 0.05$ ). The overweight and obesity prevalence were also significantly higher among moderate and high total media users than low media users ( $P < 0.001$ ).

The result estimates a significant association between screen-based electronic device use with overweight, and obesity (Table 3). This study presents the results in the form of relative risk ratios which report a change in the odds of overweight and obesity associated with a change in the level of explanatory variables. The present study revealed that EM use was a

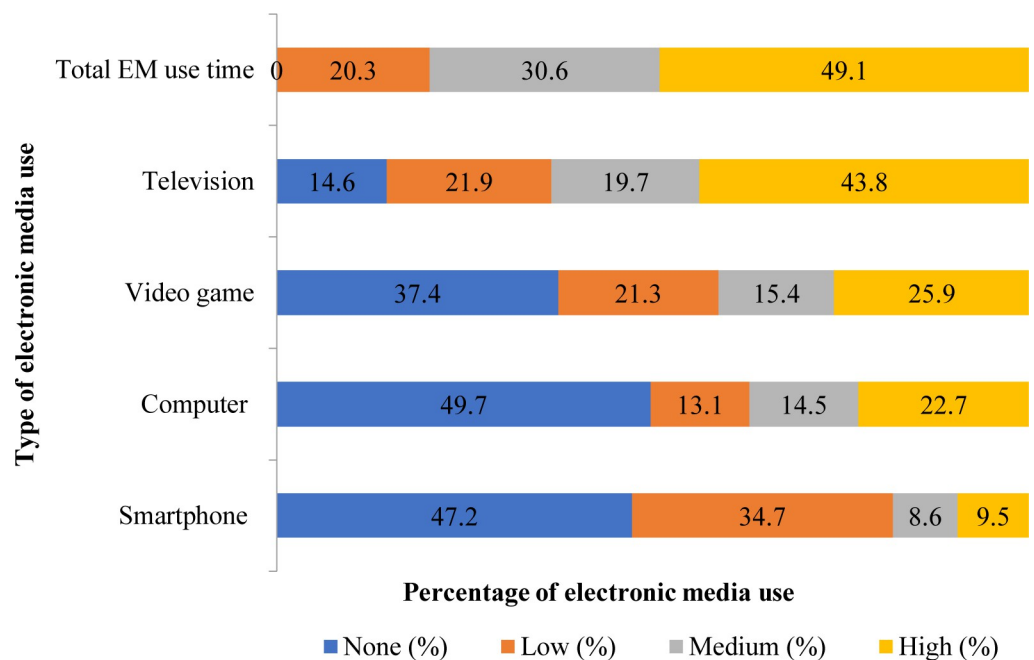

Fig 2. Adolescents spent time using electronic media (EM).

<https://doi.org/10.1371/journal.pone.0280544.g002>

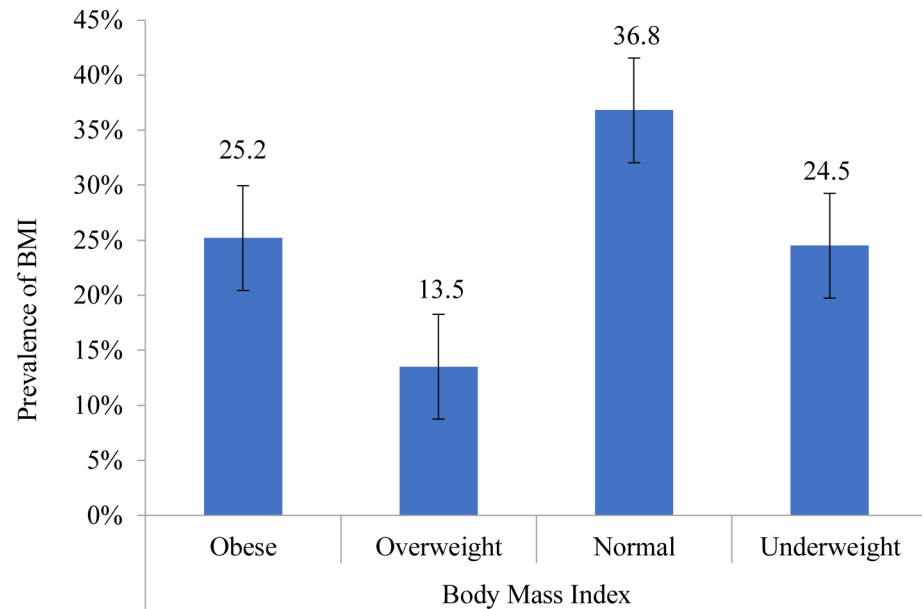

**Fig 3. Anthropometric assessment of school adolescents.**

<https://doi.org/10.1371/journal.pone.0280544.g003>

significant predictor of overweight among school adolescents. The regression model explains that the odds of being overweight were 2.53 (95% CI: 1.23–3.86) times higher among adolescents who had unhealthy eating habits during electronic media use than their counterparts having no unhealthy eating habits. Conversely, adolescents who performed physical exercise were 0.62 times less likely to be overweight compared with counterparts who had no physical activity. Adolescents who watched television at moderate and high levels were 2.12 (95% CI: 1.23–3.21) times and 4.58 (95% CI: 1.46–7.95) times more likely to be overweight relative to peers who did not watch television. Among adolescents, the odds of being overweight were 2.29 (95% CI: 1.25–3.64) times and 4.45 (95% CI: 2.75–6.12) times higher among moderately and highly played video games compared with those who did not play video games. Again, adolescents who reported a moderate and high level of computer use were more likely to be overweight (RRR: 2.21, 95% CI: 1.31–3.16;  $P = 0.02$ ) and (RRR: 3.18, 95% CI: 1.87–4.70;  $P < 0.001$ ) than those who did not use the computer. The results also showed that adolescents with a high level of smartphone use were 2.15 times more likely to be overweight than those who did not use the smartphone. Additionally, in terms of total screen-based electronic devices usage, the odds of being overweight among moderate and high-level electronic media use were 4.92 (95% CI: 2.45–7.10) and 7.36 (95% CI: 3.64–11.54) times higher compared with those school adolescents who spent the least amount of time, respectively.

The present study also explored the relationship between screen-based electronic device uses with obesity (Table 3). However, adolescents having unhealthy eating habits during electronic media use were 2.40 (95% CI: 1.12–3.69) times higher odds of obesity. Adolescents who performed physical exercise were 0.48 times less likely to be obese. The study findings also suggest that the odds of obesity among moderate and high-level television user adolescents were 1.11 (95% CI: 0.53–2.06,  $P = 0.04$ ) times and 2.89 (95% CI: 1.31–5.21,  $P = 0.03$ ) times more likely compared with those who did not use television. Regarding the association between video game use with obesity, adolescent students who reported a moderate and high level of video game use were 1.69 (95% CI: 0.78–2.69,  $P = 0.04$ ) times and 3.88 (95% CI: 1.74–5.13,  $P = 0.01$ ) times more likely to obese compared with peers those who did not play video games.



Table 2. Bivariate analysis of exposure variable with BMI in Bangladeshi adolescents.

| Exposure Variables                                         | Body Mass Index |                               |                          |                            |                                 | <i>p</i> -value |
|------------------------------------------------------------|-----------------|-------------------------------|--------------------------|----------------------------|---------------------------------|-----------------|
|                                                            | Total           | Overweight<br>(n = 47, 13.5%) | Obese<br>(n = 88, 25.2%) | Normal<br>(n = 129, 36.8%) | Under-weight<br>(n = 86, 24.5%) |                 |
|                                                            | n (%)           | %                             | %                        | %                          | %                               |                 |
| <b>Gender</b>                                              |                 |                               |                          |                            |                                 |                 |
| Boys                                                       | 213 (60.8)      | 14.5                          | 25.4                     | 38.5                       | 21.6                            | 0.113           |
| Girl                                                       | 137 (39.2)      | 11.7                          | 24.8                     | 34.3                       | 29.2                            |                 |
| <b>Class</b>                                               |                 |                               |                          |                            |                                 |                 |
| Eight                                                      | 150 (42.9)      | 14.0                          | 25.3                     | 34.7                       | 26.0                            | 0.891           |
| Nine                                                       | 200 (57.1)      | 13.0                          | 25.0                     | 38.5                       | 23.5                            |                 |
| <b>Unhealthy eating habits during electronic media use</b> |                 |                               |                          |                            |                                 |                 |
| No                                                         | 169 (48.3)      | 13.1                          | 17.1                     | 41.1                       | 28.7                            | 0.032           |
| Yes                                                        | 181 (51.7)      | 14.2                          | 34.5                     | 33.0                       | 18.3                            |                 |
| <b>Physical exercise (<math>\geq 30</math> min/day)</b>    |                 |                               |                          |                            |                                 |                 |
| No                                                         | 218 (62.4)      | 14.3                          | 32.2                     | 33.2                       | 19.8                            | 0.011           |
| Yes                                                        | 132 (37.6)      | 13.8                          | 21.2                     | 39.1                       | 26.4                            |                 |
| <b>Television</b>                                          |                 |                               |                          |                            |                                 |                 |
| None (0 min/day)                                           | 51 (14.6)       | 13.7                          | 21.6                     | 37.3                       | 27.4                            | 0.013           |
| Low (<69 min/day)                                          | 76 (21.9)       | 15.7                          | 35.3                     | 26.9                       | 22.1                            |                 |
| Moderate ( $\geq 69$ to <115 min/day)                      | 68 (19.7)       | 13.2                          | 22.1                     | 36.8                       | 27.9                            |                 |
| High ( $\geq 115$ min/day)                                 | 155 (43.8)      | 11.6                          | 23.2                     | 46.7                       | 18.5                            |                 |
| <b>Video Games</b>                                         |                 |                               |                          |                            |                                 |                 |
| None (0 min/day)                                           | 131 (37.4)      | 11.5                          | 30.4                     | 34.3                       | 23.8                            | 0.088           |
| Low (>0 to <30 min/day)                                    | 74 (21.3)       | 14.8                          | 27.1                     | 31.1                       | 27.0                            |                 |
| Moderate ( $\geq 30$ to <45 min/day)                       | 54 (15.4)       | 14.8                          | 18.5                     | 35.3                       | 31.4                            |                 |
| High ( $\geq 45$ min/day)                                  | 91 (25.9)       | 14.5                          | 19.8                     | 44.2                       | 21.5                            |                 |
| <b>Computer</b>                                            |                 |                               |                          |                            |                                 |                 |
| None (0 min/day)                                           | 173 (49.7)      | 11.6                          | 27.3                     | 33.7                       | 27.4                            | <0.001          |
| Low (>0 to <30 min/day)                                    | 45 (13.1)       | 11.1                          | 15.5                     | 46.6                       | 26.8                            |                 |
| Moderate ( $\geq 30$ to <45 min/day)                       | 51 (14.5)       | 15.6                          | 21.6                     | 41.3                       | 21.5                            |                 |
| High ( $\geq 45$ min/day)                                  | 81 (22.7)       | 17.2                          | 28.3                     | 35.8                       | 18.7                            |                 |
| <b>Smartphone use</b>                                      |                 |                               |                          |                            |                                 |                 |
| None (0 min/day)                                           | 165 (47.2)      | 12.2                          | 26.5                     | 37.9                       | 23.4                            | 0.042           |
| Low (>0 to <16 min/day)                                    | 121 (34.7)      | 11.6                          | 18.8                     | 40.7                       | 28.9                            |                 |
| Moderate ( $\geq 16$ to <30 min/day)                       | 30 (8.6)        | 16.6                          | 35.6                     | 28.9                       | 18.9                            |                 |
| High ( $\geq 30$ min/day)                                  | 34 (9.5)        | 21.5                          | 27.8                     | 29.6                       | 21.1                            |                 |
| <b>Total electronic media use</b>                          |                 |                               |                          |                            |                                 |                 |
| Low (<121 min/day)                                         | 71 (20.3)       | 9.8                           | 17.8                     | 51.7                       | 20.7                            | <0.001          |
| Moderate ( $\geq 121$ to 180 min/day)                      | 107 (30.6)      | 13.8                          | 26.3                     | 31.7                       | 28.2                            |                 |
| High ( $\geq 181$ min/day)                                 | 172 (49.1)      | 15.3                          | 27.8                     | 37.3                       | 19.6                            |                 |

<https://doi.org/10.1371/journal.pone.0280544.t002>

Moreover, adolescents who used a computer at moderate and high levels were 1.91 times and 3.08 times more likely to be obese relative to peers who did not use a computer. The results also showed that adolescents with a high level of smartphone use were 1.19 times more likely to be obese than those who did not use the smartphone. In addition, the rate of obesity among school adolescents with a moderate and high level of total SED use was 6.52 times (RRR: 6.52, 95% CI: 3.57–8.89,  $P = 0.04$ ) and 8.72 times (RRR: 8.72, 95% CI: 4.64–12.54,  $P < 0.001$ ) higher than those who spent the least amount of time.

**Table 3. Multinomial logistic regression for the association between electronic media use with BMI.**

| Exposure Variables                                         | Body Mass Index           |                           |
|------------------------------------------------------------|---------------------------|---------------------------|
|                                                            | Overweight versus Normal  | Obese versus Normal       |
|                                                            | RRR (95% CI), P-value     | RRR (95% CI), P-value     |
| <b>Gender</b>                                              |                           |                           |
| Girl                                                       | Reference                 | Reference                 |
| Boys                                                       | 0.92 (0.89–1.03), 0.54    | 0.83 (0.82–0.96), 0.42    |
| <b>Class</b>                                               |                           |                           |
| Eight                                                      | Reference                 | Reference                 |
| Nine                                                       | 1.44 (1.03–1.86), 0.07    | 1.31 (0.94–1.70), 0.53    |
| <b>Unhealthy eating habits during electronic media use</b> |                           |                           |
| No                                                         | Reference                 | Reference                 |
| Yes                                                        | 2.53 (1.23–3.86), 0.001   | 2.40 (1.12–3.69), 0.001   |
| <b>Physical exercise (<math>\geq 30</math> min/day)</b>    |                           |                           |
| No                                                         | Reference                 | Reference                 |
| Yes                                                        | 0.62 (0.54–0.71), 0.01    | 0.48 (0.43–0.56), 0.001   |
| <b>Television</b>                                          |                           |                           |
| None (0 min/day)                                           | Reference                 | Reference                 |
| Low (<69 min/day)                                          | 1.29 (0.56–2.18), 0.15    | 0.70 (0.33–1.08), 0.21    |
| Moderate ( $\geq 69$ to <115 min/day)                      | 2.12 (1.23–3.21), 0.02    | 1.11 (0.53–2.06), 0.04    |
| High ( $\geq 115$ min/day)                                 | 4.58 (1.46–7.95), 0.04    | 2.89 (1.31–5.21), 0.03    |
| <b>Video Games</b>                                         |                           |                           |
| None (0 min/day)                                           | Reference                 | Reference                 |
| Low (>0 to <30 min/day)                                    | 0.85 (0.34–1.39), 0.64    | 0.90 (0.52–1.42)          |
| Moderate ( $\geq 30$ to 45 min/day)                        | 2.29 (1.25–3.64), 0.03    | 1.69 (0.78–2.69), 0.04    |
| High ( $\geq 45$ min/day)                                  | 4.45 (2.75–6.12), 0.001   | 3.88 (1.74–5.13), 0.01    |
| <b>Computer</b>                                            |                           |                           |
| None (0 min/day)                                           | Reference                 | Reference                 |
| Low (>0 to <30 min/day)                                    | 0.76 (0.25–1.34), 0.66    | 0.86 (0.46–1.03), 0.72    |
| Moderate ( $\geq 30$ to 45 min/day)                        | 2.21 (1.31–3.16), 0.02    | 1.91 (0.76–3.28), 0.03    |
| High ( $\geq 45$ min/day)                                  | 3.18 (1.87–4.70), <0.001  | 3.08 (1.32–4.86), <0.001  |
| <b>Smartphone use</b>                                      |                           |                           |
| None (0 min/day)                                           | Reference                 | Reference                 |
| Low (>0 to <16 min/day)                                    | 0.98 (0.57–1.40), 0.58    | 0.64 (0.25–1.14), 0.66    |
| Moderate ( $\geq 16$ to <30 min/day)                       | 0.70 (0.37–1.14), 0.43    | 0.60 (0.31–1.09), 0.44    |
| High ( $\geq 30$ min/day)                                  | 2.15 (1.23–3.51), 0.001   | 1.19 (0.93–1.48), 0.002   |
| <b>Total electronic media use</b>                          |                           |                           |
| Low (<121 min/day)                                         | Reference                 | Reference                 |
| Moderate ( $\geq 121$ to 180 min/day)                      | 4.92 (2.45–7.10), 0.03    | 6.52 (3.57–8.89), 0.04    |
| High ( $\geq 181$ min/day)                                 | 7.36 (3.64–11.54), <0.001 | 8.72 (4.64–12.54), <0.001 |

Note: The model was adjusted with gender, grade of school, unhealthy eating habits, and physical exercise variables.

<https://doi.org/10.1371/journal.pone.0280544.t003>

## 4. Discussion

In this study, we examined the hypothesis that electronic media uses are implicated in the rising prevalence of overweight and obesity in Bangladeshi secondary school adolescents. Using multinomial logistic regression, this study found a significant multiplicative interaction between overweight and obesity with electronic media used among secondary school

adolescents. In addition, the present study found that daily television viewing, playing video games, computer, and mobile phone use, and total electronic devices use time was associated with overweight and obesity.

In the current study, unhealthy eating habits during electronic media use were significantly associated with overweight and obesity. The previous findings from other countries are in a line with our findings [12, 35, 36]. This could be due to prolonged sedentary behavior and high energy intake may promote visceral fat in adolescents [37]. Unhealthy eating habits including diets that are higher in fat, and drink in more sodas, and fast food during electronic device use may lead to overconsumption among school adolescents [35, 38]. In agreement with previous experimental studies [39, 40], the present study found that physical exercise was inversely associated with overweight and obesity in secondary school adolescents. Recently, different studies explained that excess screen time in adolescents, increased sedentary time, and unhealthy dietary behaviors are also associated with physical inactivity [41, 42].

This study also found that excessive TV viewing was associated with overweight and obesity among school adolescents. The strength of these associations is consistent with those found in previous studies [18, 43, 44]. Other studies conducted in different countries have confirmed that watching television is positively associated with overweight and obesity in school adolescents [45–47]. From the evidence, though it has been proved that long hours of watching TV are associated with adolescent obesity [18, 45], all screen-based electronic media should be considered attention.

Furthermore, this study reported that the use of video games was significantly associated with school adolescents being overweight and obesity. This finding is in line with an earlier study that found adolescents with a longer time playing electronic games daily were increased risk of obesity [13]. Prior studies also revealed that increased hours of playing video games increased the risk of adolescents being overweight and obesity [13, 47]. The main reason for increasing weight among young adolescents is that they play video games as a substitute for regular physical exercise which expenditure less energy than required [13, 48].

Another important finding of this study is that heavy use of computer was significantly associated with overweight and obesity. Several studies have also linked a stronger association between computer use and obesity in adolescents [14, 47]. Besides, recent studies claim that the likelihood of obesity is higher among young adolescents with heavy computer use [17, 22, 44, 49]. This study revealed that obesity increased in adolescents who spent high time on a smartphone compared with non-user adolescents in all the survey periods. The findings of the study concerning the relationship between smartphone use and obesity are consistent with prior studies [13, 14, 22]. Finally, the present study revealed that overall electronic media usage was a significant predictor of overweight and obesity among school adolescents. Additionally, the current study results also indicate that spending above 2 hours daily on any electronic media device was significantly associated with increased odds of being overweight and obese among school adolescents. This finding is also consistent with other previous research suggesting that the use of electronic media is associated with adolescent overweight and obesity [4, 15, 50, 51].

There are several possible justifications for our study findings that explain the effects of electronic media use on obesity in adolescents [35, 36]. Firstly, the displacement of physical activity with sedentary leisure-time use increased the adolescent's BMI [35, 36, 46]. Secondly, it is also important to consider that electronic media use affects the dietary choice and more energy consumption which may contribute to adolescent obesity [35, 36]. Some epidemiological studies explain that heavy electronic media can lead to consuming more energy (i.e., energy-dense snacks, energy-dense drinks, and fast food while viewing) [12, 19]. Additionally, another explanation for the association between electronic media use and obesity is food advertising which led to consuming more energy among young adolescents [52, 53]. Finally,

inadequate sleep is another possible explanation associated with electronic media use, excess energy consumption, and obesity [35].

To the best of our knowledge, this is the first population-based study that investigates the pattern of the time usage of common electronic devices among Bangladeshi secondary school adolescents and explores the association between overweight, and obesity with electronic media use. This finding suggests that using electronic media (EM) at a specific level would be a risk factor for increasing overweight and obesity in these young adolescents. In addition, further longitudinal studies are needed to investigate the detailed pattern of EM usage and its associations with BMI.

Moreover, the current findings recommend effective interventions which can be designed to reduce overweight in-school adolescents and improve their health status. The types of behavioral interventions including classroom-based physical education lessons, changing school diet patterns in the school cafeteria, and automated screen monitoring devices to control screen time at school and home may provide useful evidence to adolescents for reducing their weight [54–56]. Additionally, active video games and healthy diet-related videos have the potential to improve body composition in overweight and obese adolescents [57, 58]. Nowadays, involving more common physical activity, healthy dietary choices, and minimizing the recreational use of EM could be implemented for managing a healthy weight. This study also may provide useful evidence to adolescent health policymakers and parents to initiate adolescent health-based interventions to reduce obesity among young adolescents and thus improve their health status.

This study has some potential limitations that should be considered. First, the study results might be vulnerable to self-reported bias, as data on media use and other covariates were self-reported. Second, this study also covered a limited area and the sample was convenient which may limit generalization. Furthermore, this study is a cross-sectional design, which does not clarify the causal directions of the relationships. Longitudinal studies are essential to confirm our results. This study might be considered a robust method to find descriptive statistics and identify new promising problems as a result of their low budget and high feasibility.

## 5. Conclusion

This study reveals that adolescents who used one or more types of screen-based electronic devices for more than two hours per day were more likely to be overweight and obese, but this association varies depending on the type of electronic device used. The study found that television watching was found to be associated with the risk of overweight and obesity was higher among school-going adolescents. This study also revealed that video game playing, computer, and smartphone use were associated with overweight and obesity among adolescents. However, this study strongly encourages the future to conduct longitudinal studies to confirm our findings and establish the trend of correlation with weight status. Implementation of school-based intervention programs may effectively reduce the use of EM among youth adolescents. Besides, parents should play an important role to reduce the time their children spend using electronic devices and encourage them to engage in physical activities.

## Supporting information

**S1 File.** The questionnaire template is available in both English and the native language. (DOCX)

## Acknowledgments

All the authors wish to express their gratitude to the participants who volunteered for this study.

## Author Contributions

**Conceptualization:** Suvasish Das Shuvo.

**Data curation:** Suvasish Das Shuvo, Biplob Kumar Biswas.

**Formal analysis:** Suvasish Das Shuvo, Biplob Kumar Biswas.

**Investigation:** Suvasish Das Shuvo.

**Methodology:** Suvasish Das Shuvo, Biplob Kumar Biswas.

**Supervision:** Suvasish Das Shuvo.

**Validation:** Suvasish Das Shuvo.

**Visualization:** Suvasish Das Shuvo.

**Writing – original draft:** Suvasish Das Shuvo, Biplob Kumar Biswas.

**Writing – review & editing:** Suvasish Das Shuvo, Biplob Kumar Biswas.

## References

1. World Health Organization. (2021). Working for a brighter, healthier future: how WHO improves health and promotes well-being for the world's adolescents.
2. Wang Y, Lobstein TI. Worldwide trends in childhood overweight and obesity. *International journal of pediatric obesity*. 2006; 1(1):11–25. <https://doi.org/10.1080/17477160600586747> PMID: 17902211
3. Lobstein T, Brinsden H. Atlas of childhood obesity. World Obesity Federation. 2019; 1(October):213. Available from: <https://www.worldobesity.org/nlsegmentation/global-atlas-on-childhood-obesity>.
4. Robinson TN, Banda JA, Hale L, Lu AS, Fleming-Milici F, Calvert SL, Wartella E. Screen media exposure and obesity in children and adolescents. *Pediatrics*. 2017; 140(Supplement 2):S97–101. <https://doi.org/10.1542/peds.2016-1758K> PMID: 29093041
5. De Onis M, Blössner M. Prevalence and trends of overweight among preschool children in developing countries. *The American journal of clinical nutrition*. 2000; 72(4):1032–9. <https://doi.org/10.1093/ajcn/72.4.1032> PMID: 11010948
6. Biswas T, Islam A, Islam MS, Pervin S, Rawal LB. Overweight and obesity among children and adolescents in Bangladesh: a systematic review and meta-analysis. *Public Health*. 2017; 142:94–101. <https://doi.org/10.1016/j.puhe.2016.10.010> PMID: 28057205
7. Bulbul T, Hoque M. Prevalence of childhood obesity and overweight in Bangladesh: findings from a countrywide epidemiological study. *BMC pediatrics*. 2014; 14(1):1–8. <https://doi.org/10.1186/1471-2431-14-86> PMID: 24690395
8. Tanwi TS, Chakrabarty S, Hasanuzzaman S. Double burden of malnutrition among ever-married women in Bangladesh: a pooled analysis. *BMC women's health*. 2019; 19(1):1–8. <https://doi.org/10.1186/s12905-019-0725-2>
9. Biddle SJ, Bengoechea EG, Wiesner G. Sedentary behaviour and adiposity in youth: a systematic review of reviews and analysis of causality. *International Journal of Behavioral Nutrition and Physical Activity*. 2017; 14(1):1–21. <https://doi.org/10.1186/s12966-017-0497-8>
10. Bames J, Behrens TK, Benden ME, Biddle S, Bond D, Brassard P, et al. Standardized use of the terms "sedentary" and "sedentary behaviours". *Applied Physiology Nutrition and Metabolism-Physiologie Appliquee Nutrition Et Metabolisme*. 2012; 37:540–2.
11. Throuvala MA, Griffiths MD, Rennoldson M, Kuss DJ. The role of recreational online activities in school-based screen time sedentary behaviour interventions for adolescents: A systematic and critical literature review. *International Journal of Mental Health and Addiction*. 2021 Aug; 19(4):1065–115.
12. Pearson N, Biddle SJ. Sedentary behavior and dietary intake in children, adolescents, and adults: a systematic review. *American journal of preventive medicine*. 2011; 41(2):178–88. <https://doi.org/10.1016/j.amepre.2011.05.002>
13. Ratan ZA, Parrish AM, Alotaibi MS, Ratan ZA, Parrish AM, Alotaibi MS, et al. Prevalence of smartphone addiction and its association with sociodemographic, physical and mental well-being: a cross-sectional study among the young adults of Bangladesh. *International journal of environmental research and public health*. 2022 Jan; 19(24):16583. <https://doi.org/10.3390/ijerph192416583> PMID: 36554468

14. Yen CF, Hsiao RC, Ko CH, Yen JY, Huang CF, Liu SC, et al. The relationships between body mass index and television viewing, internet use and cellular phone use: The moderating effects of socio-demographic characteristics and exercise. *International Journal of Eating Disorders*. 2010; 43(6):565–71. <https://doi.org/10.1002/eat.20683> PMID: 19718665
15. Melkevik O, Haug E, Rasmussen M, Fismen AS, Wold B, Borraccino A, et al. Are associations between electronic media use and BMI different across levels of physical activity?. *BMC Public Health*. 2015; 15(1):1–0. <https://doi.org/10.1186/s12889-015-1810-6> PMID: 25986730
16. Braithwaite I, Stewart AW, Hancox RJ, Beasley R, Murphy R, Mitchell EA, ISAAC Phase Three Study Group. The worldwide association between television viewing and obesity in children and adolescents: cross sectional study. *PloS one*. 2013 Sep 25; 8(9):e74263. <https://doi.org/10.1371/journal.pone.0074263> PMID: 24086327
17. Lajunen HR, Keski-Rahkonen A, Pulkkinen L, Rose RJ, Rissanen A, Kaprio J. Are computer and cell phone use associated with body mass index and overweight? A population study among twin adolescents. *BMC public health*. 2007; 7(1):1–8. <https://doi.org/10.1186/1471-2458-7-24> PMID: 17324280
18. Rincón-Pabón D, Urazán-Hernández Y, González-Santamaría J. Association between the time spent watching television and the sociodemographic characteristics with the presence of overweight and obesity in Colombian adolescents (secondary analysis of the ENSIN 2010). *Plos one*. 2019 May 7; 14(5):e0216455. <https://doi.org/10.1371/journal.pone.0216455> PMID: 31063492
19. Chaput JP, Visby T, Nyby S, Klingenberg L, Gregersen NT, Tremblay A, et al. Video game playing increases food intake in adolescents: a randomized crossover study. *The American journal of clinical nutrition*. 2011; 93(6):1196–203. <https://doi.org/10.3945/ajcn.110.008680> PMID: 21490141
20. Lin SSJ, Tsai CC. Sensation seeking and internet dependence of Taiwanese high school adolescents. *Comput Hum Behav* 2002; 18:411–426.
21. Young KS, Rogers RC. The relationship between depression and Internet addiction. *Cyberpsychol Behav* 1998; 1:25–28.
22. Al-Agha AE, Nizar FS, Nahhas AM. The association between body mass index and duration spent on electronic devices in children and adolescents in Western Saudi Arabia. *Saudi medical journal*. 2016 Apr; 37(4):436. <https://doi.org/10.15537/smj.2016.4.15018> PMID: 27052287
23. Katzmarzyk PT, Church TS, Craig CL, Bouchard C. Sitting time and mortality from all causes, cardiovascular disease, and cancer. *Med Sci Sports Exerc*. 2009; 41(5):998–1005. <https://doi.org/10.1249/MSS.0b013e3181930355> PMID: 19346988
24. Baker JL, Olsen LW, Sørensen TI. Childhood body-mass index and the risk of coronary heart disease in adulthood. *N Engl J Med* 2007; 357:2329e37. <https://doi.org/10.1056/NEJMoa072515> PMID: 18057335
25. Flegal KM, Kit BK, Orpana H, Graubard BI. Association of All-Cause Mortality With Overweight and Obesity Using Standard Body Mass Index Categories A Melkevik et al. *BMC Public Health* (2015) 15:497 Page 8 of 10 Systematic Review and Meta-analysis All-Cause Mortality Using BMI Categories. *JAMA*. 2013; 309(1):71–82.
26. St-Onge MP, Heymsfield SB. Overweight and obesity status are linked to lower life expectancy. *Nutr Rev* 2003; 61:313e6. <https://doi.org/10.1301/nr.2003.sept.313-316> PMID: 14552067
27. Khan A, Burton NW. Screen-based behaviors of adolescents in Bangladesh. *Journal of Physical Activity and Health*. 2016 Nov 1; 13(11):1156–1163. <https://doi.org/10.1123/jpah.2015-0514> PMID: 27334303
28. Byuro BP. Bangladesh Population & Housing Census 2011: Zila Tangail: Bangladesh Bureau of Statistics. Statistics and Informatics Division, Ministry of Planning, Government of the People's Republic of Bangladesh. 2013.
29. Cole TJ, Lobstein T. Extended international (IOTF) body mass index cut-offs for thinness, overweight and obesity. *Pediatric obesity*. 2012 Aug; 7(4):284–94. <https://doi.org/10.1111/j.2047-6310.2012.00064.x> PMID: 22715120
30. Qian K, Tan L, Li S, Li Z, Yu F, Liang H, et al. Comparison of different BMI cut-offs to screen for child and adolescent obesity in urban China. *Public Health Nutrition*. 2020 Oct; 23(14):248593. <https://doi.org/10.1017/S13688980020000828> PMID: 32517841
31. Ridley K, Ainsworth BE, Olds TS. Development of a compendium of energy expenditures for youth. *International Journal of Behavioral Nutrition and Physical Activity*. 2008; 5(1):1–8. <https://doi.org/10.1186/1479-5868-5-45> PMID: 18782458
32. Ridley K, Olds TS, Hill A. *International Journal of Behavioral Nutrition and Physical Activity*. The Multi-media activity recall for children and adolescents (MARCA): development and evaluation. 2006; 11:1–11. Available from: <https://ijbnpa.biomedcentral.com/track/pdf/10.1186/1479-5868-3-10>
33. Mathers M, Canterford L, Olds T, Hesketh K, Ridley K, Wake M. Electronic media use and adolescent health and well-being: cross-sectional community study. *Academic pediatrics*. 2009 Sep 1; 9(5):307–14. <https://doi.org/10.1016/j.acap.2009.04.003> PMID: 19592322

34. Neter J, Kutner MH, Nachtsheim CJ, Wasserman W. Applied linear statistical models. 1996.
35. Jordan AB, Kramer-Golinkoff EK, Strasburger VC. Does adolescent media use cause obesity and eating disorders. *Adolesc Med State Art Rev*. 2008; 19(3):431–49. PMID: [19227385](https://pubmed.ncbi.nlm.nih.gov/19227385/)
36. Strasburger VC, Mulligan DA, Altmann TR, Brown A, Christakis DA, Clarke-Pearson K, et al. Policy statement-Children, adolescents, obesity, and the media. *Pediatrics*. 2011; 128(1):201–8. <https://doi.org/10.1542/peds.2011-1066>
37. Staiano AE, Harrington DM, Broyles ST, Gupta AK, Katzmarzyk PT. Television, adiposity, and cardio-metabolic risk in children and adolescents. *American journal of preventive medicine*. 2013; 44(1):40–7. <https://doi.org/10.1016/j.amepre.2012.09.049> PMID: [23253648](https://pubmed.ncbi.nlm.nih.gov/23253648/)
38. Temple J, Giacomelli A, Kent K, Roemmich J, Epstein L. Television watching increases motivated responding for food and energy intake in children. *Am J Clin Nutr* 2007; 85(2):355–61. <https://doi.org/10.1093/ajcn/85.2.355> PMID: [17284729](https://pubmed.ncbi.nlm.nih.gov/17284729/)
39. Dowda M, Ainsworth BE, Addy CL, Saunders R, Riner W. Environmental influences, physical activity, and weight status in 8- to 16-year-olds. *Arch Pediatr Adolesc Med*. 2001; 155(6):711–717. <https://doi.org/10.1001/archpedi.155.6.711> PMID: [11386963](https://pubmed.ncbi.nlm.nih.gov/11386963/)
40. McMurray RG, Harrell JS, Deng S, Bradley CB, Cox LM, Bangdiwala SI. The influence of physical activity, socioeconomic status, and ethnicity on the weight status of adolescents. *Obesity research*. 2000; 8(2):130–139. <https://doi.org/10.1038/oby.2000.14> PMID: [10757199](https://pubmed.ncbi.nlm.nih.gov/10757199/)
41. Mayne SL, Virudachalam S, Fiks AG. Clustering of unhealthy behaviors in a nationally representative sample of US children and adolescents. *Preventive medicine*. 2020; 130:105892. <https://doi.org/10.1016/j.ypmed.2019.105892>
42. Marsh S, Mhurchu CN, Maddison R. The non-advertising effects of screen-based sedentary activities on acute eating behaviours in children, adolescents, and young adults. A systematic review. *Appetite*. 2013; 71:259–73. <https://doi.org/10.1016/j.appet.2013.08.017> PMID: [24001394](https://pubmed.ncbi.nlm.nih.gov/24001394/)
43. Ngantcha M, Janssen E, Godeau E, Ehlinger V, Le-Nezet O, Beck F, et al. Revisiting factors associated with screen time media use: a structural study among school-aged adolescents. *Journal of Physical Activity and Health*. 2018 Jun 1; 15(6):448–56. <https://doi.org/10.1123/jpah.2017-0272> PMID: [29569992](https://pubmed.ncbi.nlm.nih.gov/29569992/)
44. Bickham DS, Blood EA, Walls CE, Shrier LA, Rich M. Characteristics of screen media use associated with higher BMI in young adolescents. *Pediatrics*. 2013; 131(5):935–41. <https://doi.org/10.1542/peds.2012-1197> PMID: [23569098](https://pubmed.ncbi.nlm.nih.gov/23569098/)
45. Mansoori N, Nisar N, Shahid N, Mubeen SM, Ahsan S. Prevalence of obesity and its risk factors among school children in Karachi, Pakistan. *Tropical doctor*. 2018 Oct; 48(4):266–9. <https://doi.org/10.1177/0049475518786664> PMID: [30020028](https://pubmed.ncbi.nlm.nih.gov/30020028/)
46. Al-Ghamdi SH. The association between watching television and obesity in children of school-age in Saudi Arabia. *Journal of family & community medicine*. 2013; 20(2):83. <https://doi.org/10.4103/2230-8229.114767> PMID: [23983559](https://pubmed.ncbi.nlm.nih.gov/23983559/)
47. Patriarca A, Di Giuseppe G, Albano L, Marinelli P, Angelillo IF. Use of television, videogames, and computer among children and adolescents in Italy. *BMC Public Health*. 2009; 9(1):1–0. <https://doi.org/10.1186/1471-2458-9-139> PMID: [19439070](https://pubmed.ncbi.nlm.nih.gov/19439070/)
48. Ray M, Jat KR. Effect of electronic media on children. *Indian pediatrics*. 2010; 47(7):561–8. <https://doi.org/10.1007/s13312-010-0128-9> PMID: [20683108](https://pubmed.ncbi.nlm.nih.gov/20683108/)
49. Tripathi M, Mishra SK. Screen time and adiposity among children and adolescents: a systematic review. *Journal of Public Health*. 2020; 28(3):227–44. <https://doi.org/10.1007/s10389-019-01043-x>
50. Melkevik O, Torsheim T, Rasmussen M. Patterns of screen-based sedentary behavior and physical activity and associations with overweight among Norwegian adolescents: A latent profile approach. *Nor Epidemiol*. 2010; 20(1):109–17. <https://doi.org/10.5324/nje.v20i1.1301>
51. Leatherdale ST, Wong S. Peer reviewed: association between sedentary behavior, physical activity, and obesity: inactivity among active kids. *Preventing chronic disease*. 2009; 6(1). PMID: [19080032](https://pubmed.ncbi.nlm.nih.gov/19080032/).
52. Gilbert-Diamond D, Emond JA, Lansigan RK, Rapuano KM, Kelley WM, Heatherton TF, et al. Television food advertisement exposure and FTO rs9939609 genotype in relation to excess consumption in children. *International journal of obesity*. 2017 Jan; 41(1):23–9. <https://doi.org/10.1038/ijo.2016.163> PMID: [27654143](https://pubmed.ncbi.nlm.nih.gov/27654143/)
53. Kar S, Khandelwal B. Fast foods and physical inactivity are risk factors for obesity and hypertension among adolescent school children in east district of Sikkim, India. *Journal of natural science, biology, and medicine*. 2015 Jul; 6(2):356. <https://doi.org/10.4103/0976-9668.160004> PMID: [26283829](https://pubmed.ncbi.nlm.nih.gov/26283829/)
54. Wahi G, Parkin PC, Beyene J, Uleryk EM, Birken CS. Effectiveness of interventions aimed at reducing screen time in children: a systematic review and meta-analysis of randomized controlled trials. *Archives of pediatrics & adolescent medicine*. 2011; 165(11):979–86. <https://doi.org/10.1001/archpediatrics.2011.122> PMID: [21727260](https://pubmed.ncbi.nlm.nih.gov/21727260/)

55. Schmidt ME, Haines J, O'Brien A, McDonald J, Price S, Sherry B, et al. Systematic review of effective strategies for reducing screen time among young children. *Obesity*. 2012; 20(7):1338–54. <https://doi.org/10.1038/oby.2011.348> PMID: 22222926
56. Doak CM, Visscher TL, Renders CM, Seidell JC. The prevention of overweight and obesity in children and adolescents: a review of interventions and programmes. *Obesity reviews*. 2006; 7(1):111–36. <https://doi.org/10.1111/j.1467-789X.2006.00234.x> PMID: 16436107
57. Maddison R, Foley L, Ni Mhurchu C, Jiang Y, Jull A, Prapavessis H, et al. Effects of active video games on body composition: a randomized controlled trial. *The American journal of clinical nutrition*. 2011; 94(1):156–63. <https://doi.org/10.3945/ajcn.110.009142> PMID: 21562081
58. Maddison R, Mhurchu CN, Jull A, Jiang Y, Prapavessis H, Rodgers A. Energy expended playing video console games: an opportunity to increase children's physical activity?. *Pediatric exercise science*. 2007 Aug 1; 19(3):334–43. <https://doi.org/10.1123/pes.19.3.334> PMID: 18019591
